# Supplementary material for: Endothelial CaMKII as a regulator of eNOS activity and NO-mediated vasoreactivity
Source: PubMed Central journal article supplement (PMC5653296; doi:10.1371/journal.pone.0186311), 2017-10-23

# S1 Fig

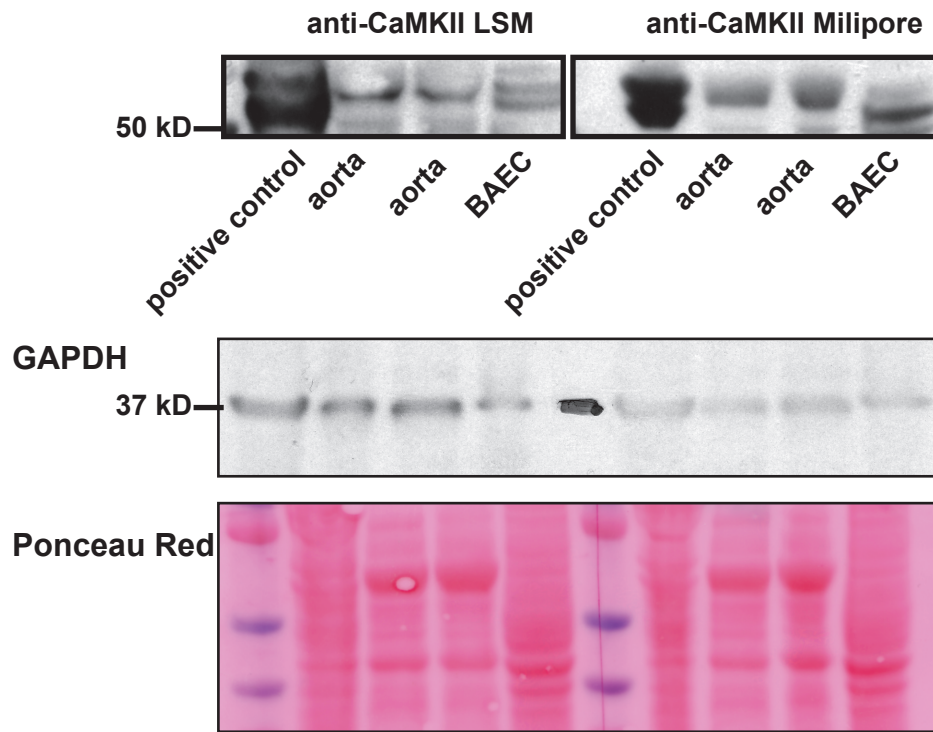

Supplement: pone.0186311.s001.pdf [file pone.0186311.s001.pdf]
